# Supplementary material for: p16-3MR: a novel model to study cellular senescence in cigarette smoke-induced lung injuries during aging
Source: Research Square preprint supplement (doi:10.21203/rs.3.rs-140689/v1), 2021-02-23
Supplement: Supplementary file 1 [file e906725a2924d83aa385dc27.docx]

**Supplementary Table 1: Real Time-PCR primer sequences**

| **Gene** | **Primer Sequence** |
| --- | --- |
| p16INK4a-Fw | 5’-AATCTCCGCGAGGAAAGC-3’ |
| p16INK4a-Rev | 5’-GTCTGCAGCGGACTCCAT-3’ |
| p21-Fw | 5’-TTGCCAGCAGAATAAAAGGTG-3’ |
| p21-Rev | 5’-TTTGCTCCTGTGCGGAAC-3’ |
| mRFP-Fw | 5’–GACCTCGGCGTCGTAGTG–3’ |
| mRFP-Rev | 5’–AAGGGCGAGATCAAGATGAG–3’ |
| IL-1a-Fw | 5’-TCCATAACCCATGATCTGGAA-3’ |
| IL-1a-Rev | 5’-TTGGTTGAGGGAATCATTCAT-3’ |
| IL-6-Fw | 5’-GCTACCAAACTGGATATAATCAGGA-3’ |
| IL-6-Rev | 5’-CCAGGTAGCTATGGTACTCCAGAA-3’ |
| CCL2-Fw | 5’-CATCCACGTGTTGGCTCA-3’ |
| CCL2-Rev | 5’-GATCATCTTGCTGGTGAATGAGT-3’ |
| CCL5-Fw | 5’-TGCAGAGGACTCTGAGACAGC-3’ |
| CCL5-Rev | 5’-GAGTGGTGTCCGAGCCATA-3’ |
| MMP12-Fw | 5’-TGAATTTGCATTTCCTGTACATAGT-3’ |
| MMP12-Rev | 5’-TGCTGTAAGTCCATGGGTGA-3’ |
| Actin-Fw | 5’-CTAAGGCCAACCGTGAAAAG-3’ |
| Actin-Rev | 5’-ACCAGAGGCATACAGGGACA-3’ |
| Tubulin-Fw | 5’-CTGGAACCCACGGTCATC-3’ |
| Tubulin-Rev | 5’-GTGGCCACGAGCATAGTTATT-3’ |
